# Supplementary material
Source: PubMed Central journal article supplement (PMC4338529)
Supplement: NIHMS60838-supplement-1.pdf [file NIHMS60838-supplement-1.pdf]

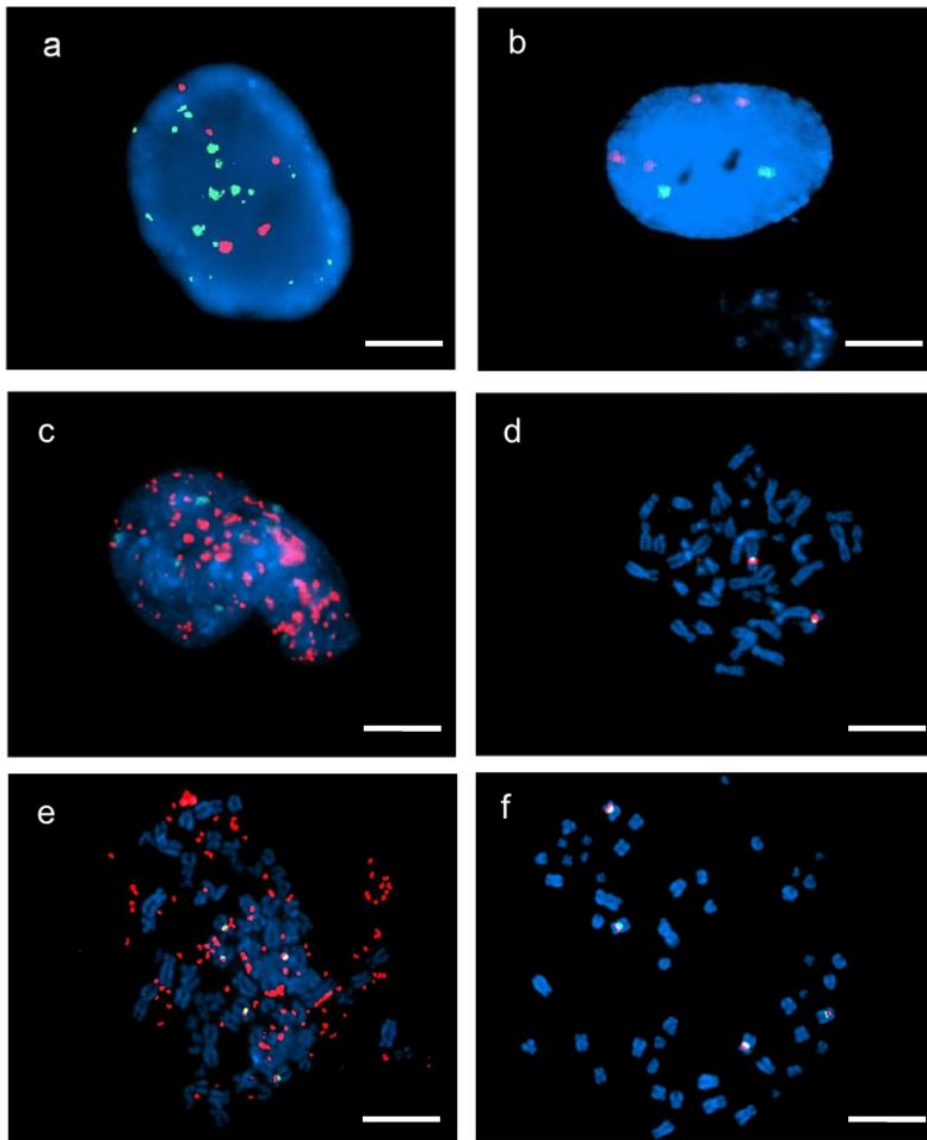

Supplementary Figure 1. FISH analysis for the detection of Double Minutes in GBM IV-34, GBM IV-39 and GBM6 tumors. Scale bars = 5 $\mu$ m.

a and b. FISH analysis for the detection of PDGFRA amplification in GBM IV-34 cells. a. primary tumor cells shows multiple copies of the PDGFRA gene visualized as many green spots. b. Cultured tumor cells do not show PDGFRA amplification (green).

c and d. FISH analysis for the detection of EGFR amplification in GBM IV-39 cells. c. FISH in primary tumor cells demonstrates euploid chromosome 7 (green signal) and multiple copies of EGFR scattered all over the nucleus (red signal). d. Cultured tumor cells shows diploid chromosome 7 (green signal) and not amplified EGFR (red signal).

e and f. FISH analysis for the detection of EGFR amplification in GBM6 cells. e. FISH in primary tumor cells shows 5 copies of chromosome 7 (green signal) and multiple copies of EGFR scattered all over the nucleus in the form of Double Minutes (red signal). f. Cultured tumor cells shows chromosomal EGFR (red signal) in close proximity of the centromeres of chromosome 7 (green signal). No EGFR copies amplified in form of Double Minutes are detectable. [Methods].

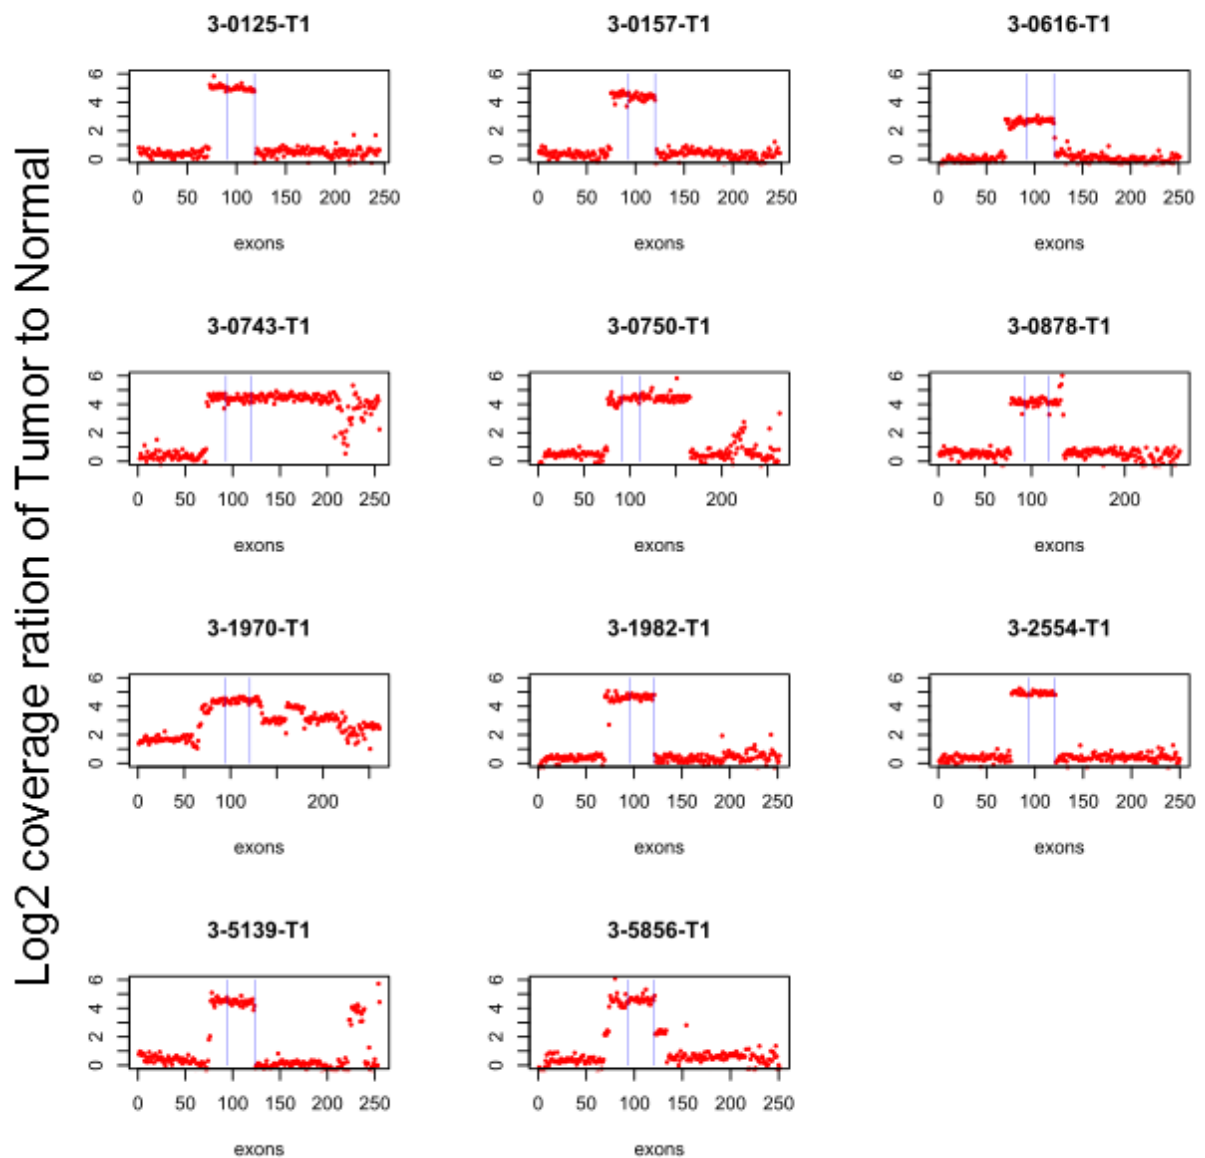

Supplementary Figure 2. Focal amplifications of EGFR locus by exome sequencing. Y axis –  $\log_2$  of the ratios between the coverages of the tumor and the normal samples. X axis – equidistantly located exons. The blue vertical line depicts the first and last exons of EGFR. In Tumors 3-1970-T1 and 3-5856-T1 at least two overlapping FAs with different edges and copy numbers are present.

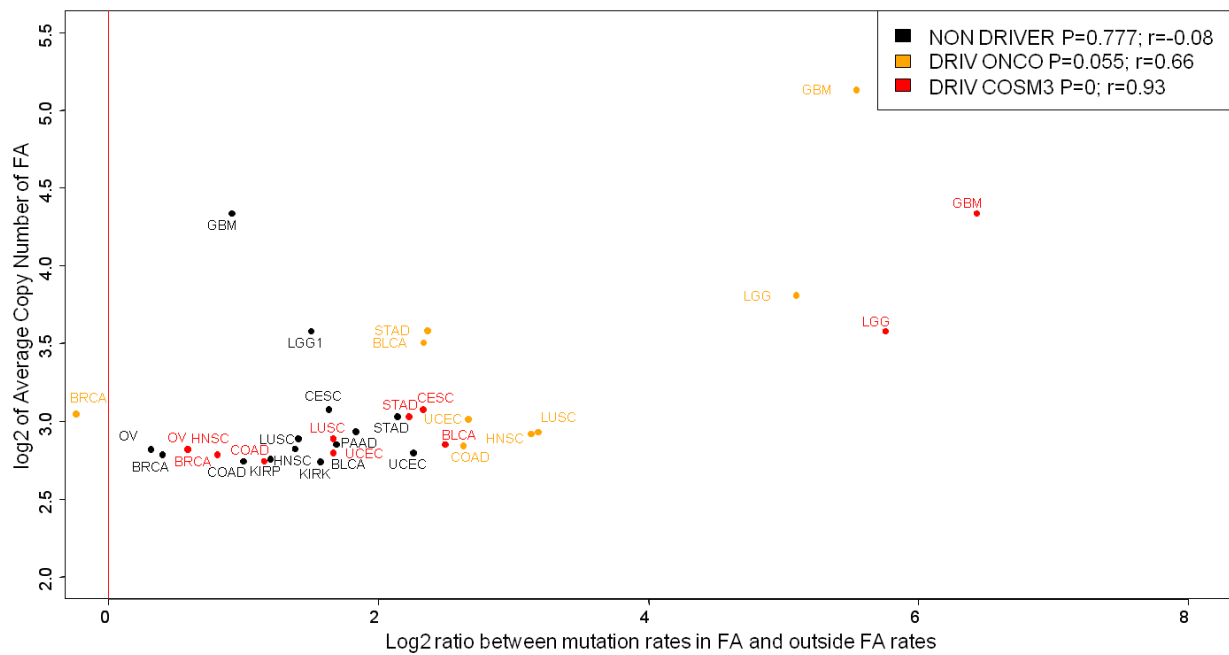

Supplementary Figure 3. Correlation of increase of mutation rates in FAs with the FA copy number. Statistical significance was assessed with ANOVA. X axis –  $\log_2$  of the ratio between mutations rates inside FAs and outside. Y axis –  $\log_2$  of the average copy number in FAs. Each data point represents the tumor type. Black – non-driver (passenger) mutations (N=14). Orange – mutations in oncogenes (N=9). Red – recurrent mutations (at least 3 times) in COSMIC v67 (N = 11). KICH was excluded from the analyses due to small amount of data. Red line represents equal mutations rates inside and outside of FAs.

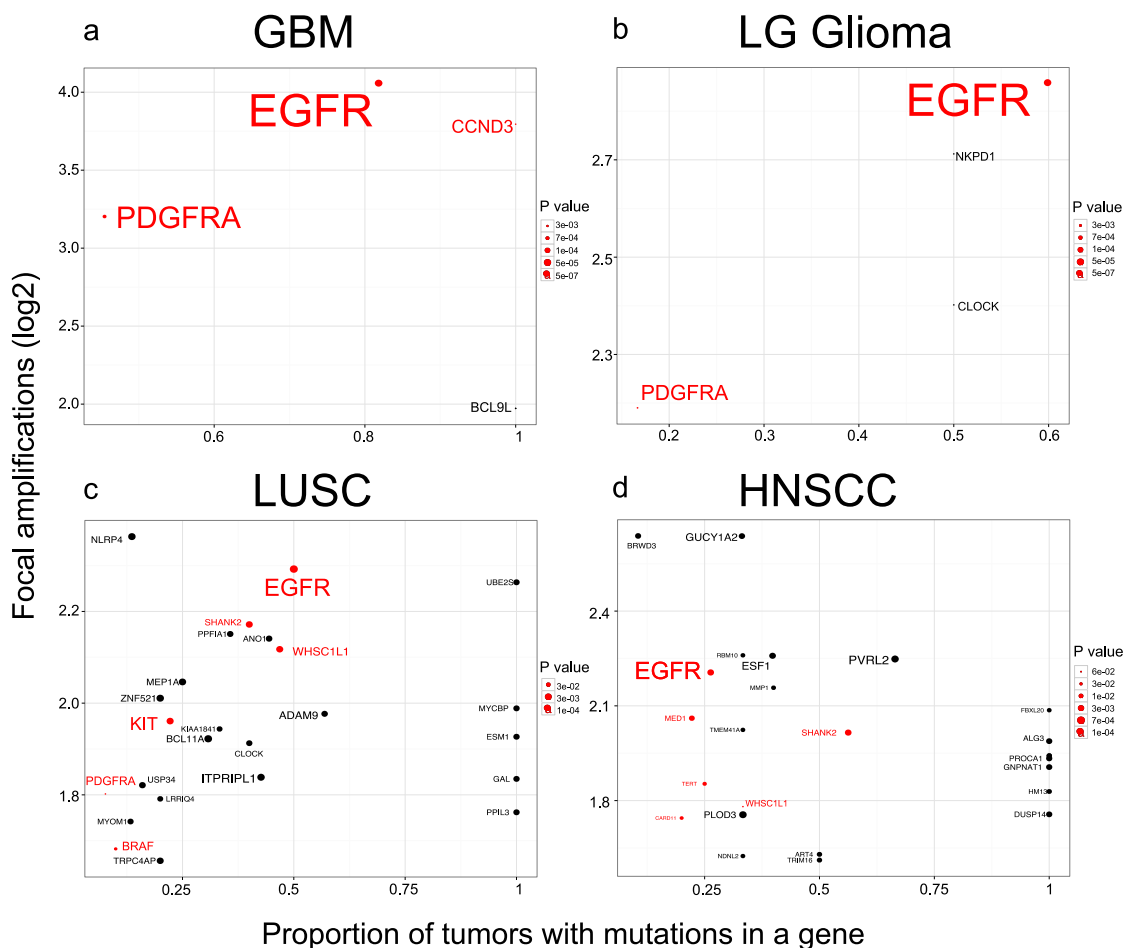

Supplementary Figure 4. Co-localizations of mutations and amplifications on gene-by-gene basis. a. glioblastoma, b. low grade glioma, c. lung squamous cell carcinoma, d. head and neck squamous cell carcinoma. X-axis - proportion of mutations in Focal Amplifications, Y-axis - log2 of average copy number in FAs. The area in circle is inversely proportional to the log2 of the log2 of the Pvalue (Fisher test). All oncogenes are selected in red. All oncogenes are presented if they have at least one mutations in FAs and a Pvalue less than 0.15, all the other genes are presented if they have at least 2 mutations in FAs and Pvalue less than 0.01

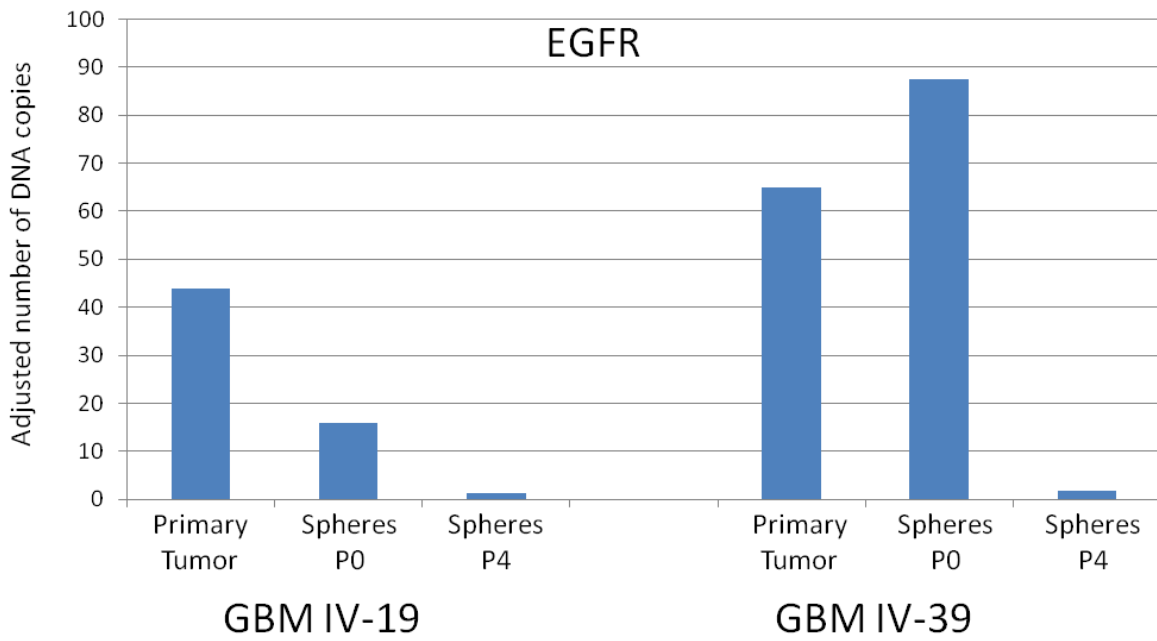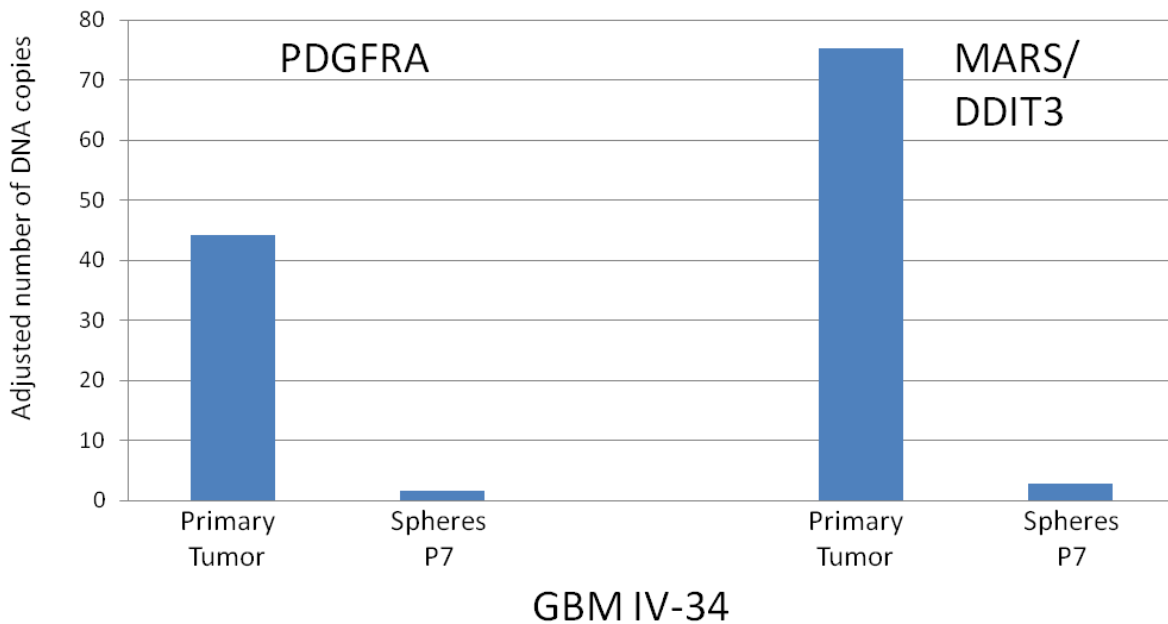

Supplementary Figure 5. qPCR analysis of the Focal Amplifications (FA) in the tumors.

Primary tumors and gliomaspheres of early passages (P0) confirm the focal amplifications with the number of copies of more than 40 per cell. FAs in the gliomaspheres at later passages (P4 and P7) are absent.

Supplementary Information

Supplementary Table 1. Tumor types from the TCGA collection used in this study

| <b>Tumor type</b> | <b>No. of samples</b> | <b>CNV analysis</b> | <b>Full tumor names</b>                                          |
|-------------------|-----------------------|---------------------|------------------------------------------------------------------|
| BLCA              | 26                    | SNP array           | Bladder Urothelial Carcinoma                                     |
| BRCA              | 763                   | SNP array           | Breast invasive carcinoma                                        |
| CESC              | 36                    | SNP array           | Cervical squamous cell carcinoma and endocervical adenocarcinoma |
| COAD              | 269                   | SNP array           | Colon adenocarcinoma                                             |
| GBM1              | 174                   | aCGH                | Glioblastoma multiforme                                          |
| HNSC              | 302                   | SNP array           | Head and Neck squamous cell carcinoma                            |
| KIRK              | 420                   | SNP array           | Kidney renal clear cell carcinoma                                |
| KIRP              | 112                   | SNP array           | Kidney renal papillary cell carcinoma                            |
| LGG1              | 218                   | SNP array           | Brain Lower Grade Glioma                                         |
| LUSC              | 178                   | SNP array           | Lung squamous cell carcinoma                                     |
| OV11              | 452                   | SNP array           | Ovarian serous cystadenocarcinoma                                |
| PAAD              | 56                    | SNP array           | Pancreatic adenocarcinoma                                        |
| STAD              | 244                   | SNP array           | Stomach Adenocarcinoma                                           |
| UCEC              | 242                   | SNP array           | Uterine Corpus Endometrioid Carcinoma                            |

Supplementary Table 2. Average high throughput sequencing coverage per glioblastoma sample

| <b>TumID</b>      | <b>Spheres</b> | <b>Tumor A</b> | <b>Tumor B</b> | <b>Normal</b> |
|-------------------|----------------|----------------|----------------|---------------|
| primary GBM IV-19 | 118            | -              | 137            | 127           |
| primary GBM IV-20 | 330            | -              | 343            | 375           |
| primary GBM IV-21 | 170            | 97             | 167            | 169           |
| primary GBM IV-34 | 175            | 56             | 171            | 165           |
| primary GBM IV-35 | 169            | 127            | 171            | 168           |
| primary GBM IV-36 | 363            | -              | 327            | 315           |
| primary GBM IV-39 | 186            | 174            | -              | 183           |
| primary GBM IV-6  | 212            | 133            | 209            | 147           |

Supplementary Table 3. Primers for qPCR used in this study

| <b>target gene</b> | <b>qPCR primer name</b> | <b>sequence</b>          |
|--------------------|-------------------------|--------------------------|
| EGFR               | 48462_EGFR_L            | ATGACGATGAGCCTGTCTGAAG   |
| EGFR               | 48463_EGFR_R            | ACTCGGCAGGAATGCAGACT     |
| PDGFRA             | 48470_PDGFRA_L          | ACAGAGGAGGAGACTGCAAGAGA  |
| PDGFRA             | 48471_PDGFRA_R          | ATGTCCCACACATGGAGTAAAGAG |
| MARS/DDIT3         | 49418Mars_F             | CCAGTGCCCTCCCTTACGTC     |
| MARS/DDIT3         | 49419Mars_R             | GCACTGAGCACACAACCAATG    |
